# Supplementary material
Source: PubMed Central journal article supplement (PMC7127929)
Supplement: NIHMS1061120-supplement-1.pdf [file NIHMS1061120-supplement-1.pdf]

**Supplementary Table 1**

CMS Chronic Condition Data Warehouse Codes for Alzheimer's Disease and Related Disorders or Senile Dementia

| Valid ICD-9/CPT4/HCPCS Codes | Description                                                                |
|------------------------------|----------------------------------------------------------------------------|
| 331.0                        | Alzheimer's Disease                                                        |
| 331.1                        | Frontotemporal dementia                                                    |
| 331.11                       | Pick's Disease                                                             |
| 331.19                       | Other frontotemporal dementia                                              |
| 331.2                        | Senile degeneration of brain                                               |
| 331.7                        | Cerebral degeneration in diseases classified elsewhere                     |
| 290.0                        | Senile dementia, uncomplicated                                             |
| 290.10                       | Presenile dementia, uncomplicated                                          |
| 290.11                       | Presenile dementia with delirium                                           |
| 290.12                       | Presenile dementia with delusional features                                |
| 290.13                       | Presenile dementia with depressive features                                |
| 290.20                       | Senile dementia with delusional features                                   |
| 290.21                       | Senile dementia with depressive features                                   |
| 290.3                        | Senile dementia with delirium                                              |
| 290.4                        | Vascular dementia, uncomplicated                                           |
| 290.41                       | Vascular dementia, with delirium                                           |
| 290.42                       | Vascular dementia, with delusions                                          |
| 290.43                       | Vascular dementia, with depressed mood                                     |
| 294.0                        | Amnestic disorder in conditions classified elsewhere                       |
| 294.10                       | Dementia in conditions classified elsewhere without behavioral disturbance |
| 294.11                       | Dementia in conditions classified elsewhere with behavioral disturbance    |
| 294.8                        | Other persistent mental disorders due to conditions classified elsewhere   |
| 797                          | Senility without mention of psychosis                                      |

**Supplementary Table 2**

Detailed Crosswalk Matching FAST Stages to OASIS Items

| FAST Stage | FAST Stage and Description Summary                                                                                                                                                                                                                                                                             | Abbreviated OASIS Item and Qualifying Score                                                                                                                                                                                                                                                                                                                                                                                                                                                                                                                                                                                                                                                                                                                                                                                                                                                                                                                                                                                                                                                                                    | Severity Category |
|------------|----------------------------------------------------------------------------------------------------------------------------------------------------------------------------------------------------------------------------------------------------------------------------------------------------------------|--------------------------------------------------------------------------------------------------------------------------------------------------------------------------------------------------------------------------------------------------------------------------------------------------------------------------------------------------------------------------------------------------------------------------------------------------------------------------------------------------------------------------------------------------------------------------------------------------------------------------------------------------------------------------------------------------------------------------------------------------------------------------------------------------------------------------------------------------------------------------------------------------------------------------------------------------------------------------------------------------------------------------------------------------------------------------------------------------------------------------------|-------------------|
| 1          | No difficulties, either subjectively or objectively                                                                                                                                                                                                                                                            | No OASIS items                                                                                                                                                                                                                                                                                                                                                                                                                                                                                                                                                                                                                                                                                                                                                                                                                                                                                                                                                                                                                                                                                                                 | 2                 |
| 2          | Complains of forgetting location of objects.<br>Subjective word finding difficulties.                                                                                                                                                                                                                          | If a record does not meet the criteria for Level 3, it was classified as a category 2                                                                                                                                                                                                                                                                                                                                                                                                                                                                                                                                                                                                                                                                                                                                                                                                                                                                                                                                                                                                                                          |                   |
| 3          | Deficits noted in demanding occupational and social settings. Decreased organizational capacity. Decreased retention of new materials. Concentration deficits, deficits evident with intensive interview. Earliest clear-cut deficits.                                                                         | M1700: Patient's current (day of assessment) level of alertness, orientation, comprehension, concentration, and immediate memory for simple commands.<br>0: Alert/Oriented, able to focus and shift attention, comprehends/recalls directions<br>1: Requires prompting (cuing, reminders) in stressful or unfamiliar situations<br>2: Requires some assistance and direction in specific situations (shifting attention)<br>3: Requires considerable assistance in routine situations. Not alert and oriented.<br>4: Totally dependent due to disturbances such as constant disorientation or coma<br>Qualifying Score: M1700 > 0                                                                                                                                                                                                                                                                                                                                                                                                                                                                                              | 3                 |
| 4          | Deficits noted in performance of complex tasks of daily life (planning dinner for guests, handling personal finances, shopping). Clear-cut deficits on exam.                                                                                                                                                   | M1880: Current ability to plan and prepare light meals or reheat delivered meals safely.<br>0: Independently plan/prepare all light meals for self or reheat delivered meals OR able but has not done so previously.<br>1: Unable to prepare light meals regularly due to Physical/Cognitive/Mental limitations<br>2: Unable to prepare any light meals or reheat delivered meals.<br>Qualifying Score: M1800 > 0                                                                                                                                                                                                                                                                                                                                                                                                                                                                                                                                                                                                                                                                                                              | 4                 |
| 5          | Requires assistance in choosing proper clothing to wear for day, season, occasion. No longer survive without assistance.                                                                                                                                                                                       | M1810 (upper body) and M1820 (lower body):<br>Current ability to dress upper/lower body safely (with or without dressing aids) including undergarments, pullovers, front-opening shirts and blouses, managing zippers, buttons, and snaps, socks, nylons, and shoes.<br>0: Able to obtain, put on, and remove clothing and shoes without assistance.<br>1: Able to dress without assistance if clothing is laid out or handed to patient.<br>2: Someone must help the patient put on clothing.<br>3: Patient depends entirely upon another person to dress the upper body.<br>Qualifying Score: M1810 > 0 AND M1820 > 0                                                                                                                                                                                                                                                                                                                                                                                                                                                                                                        | 5                 |
| 6          | Difficulty putting clothing on properly without assistance. Unable to bathe properly. Inability to handle mechanics of toileting occasionally or more frequently over the past weeks. Urinary incontinence, occasional or more frequent. Fecal incontinence, occasional or more frequently over the past week. | M1610: Urinary incontinence or urinary catheter presence.<br>0: No incontinence or catheter<br>1: Patient is incontinent<br>2: Patient requires urinary catheter<br>M1830: Current ability to wash entire body safely.<br>0: Able to bathe self in shower or tub independently, including getting in and out.<br>1: With the use of devices, is able to bathe in shower or tub independently<br>2: Able to bathe in shower or tub with the intermittent assistance of another person for intermittent supervision/reminders or to get in and out of the shower/tub, or for washing difficult to reach areas.<br>M1845: Current ability to maintain perineal hygiene and clothing management.<br>0: Able to manage toileting hygiene and clothing management without assistance<br>1: Able to manage toilet hygiene and clothing management without assistance if supplies are laid out.<br>2: Someone must help the patient to maintain toileting hygiene and/or adjust clothing.<br>3: Patient depends entirely upon another person to maintain toileting hygiene.<br>Qualifying Score: M1610 > 0 AND M1830 > 1 AND M1845 > 1 | 6                 |

(continued on next page)

Supplementary Table 2 (continued)

| FAST Stage | FAST Stage and Description Summary                                                                                                                                                                                                                                                                                                                                                                                                   | Abbreviated OASIS Item and Qualifying Score                                                                                                                                                                                                                                                                                                                                                                                                                                                                                                                                                                                                                                                                                                                                                                                                                                                                                                                                                                                                                                                                                                                                                                                                                                                                                                                                                                            | Severity Category |
|------------|--------------------------------------------------------------------------------------------------------------------------------------------------------------------------------------------------------------------------------------------------------------------------------------------------------------------------------------------------------------------------------------------------------------------------------------|------------------------------------------------------------------------------------------------------------------------------------------------------------------------------------------------------------------------------------------------------------------------------------------------------------------------------------------------------------------------------------------------------------------------------------------------------------------------------------------------------------------------------------------------------------------------------------------------------------------------------------------------------------------------------------------------------------------------------------------------------------------------------------------------------------------------------------------------------------------------------------------------------------------------------------------------------------------------------------------------------------------------------------------------------------------------------------------------------------------------------------------------------------------------------------------------------------------------------------------------------------------------------------------------------------------------------------------------------------------------------------------------------------------------|-------------------|
| 7          | Ability to speak limited to approximately a half dozen different words or fewer during an average day or during an intense interview. Speech ability limited to the use of a single intelligible word in an average day, or during an interview the person may repeat the word over and over. Ambulatory ability lost, cannot walk without personal assistance. Ability to sit up without assistance lost. Loss of ability to smile. | <p>M1230: Speech and oral (verbal) expression of language.</p> <p>0: Expresses complex ideas/feelings/needs easily, no observable deficits.</p> <p>1: Minimal difficulty in expressing ideas and needs.</p> <p>2: Expresses simple ideas or needs with moderate difficulty.</p> <p>3: Has severe difficulty expressing basic ideas/needs and requires maximal assistance or guessing by listener.</p> <p>4: Unable to express basic needs even with maximal prompting or assistance, but not comatose or unresponsive.</p> <p>5: Patient is nonresponsive or unable to speak.</p> <p>M1860: Current ability to walk safely, once in a standing position, or use a wheelchair, once in a seated position.</p> <p>0: Able to walk independently on even and uneven surfaces and navigate stairs.</p> <p>1: With the use of a one-handed device, able to walk independently on even and uneven surfaces and negotiate stairs.</p> <p>2: Requires use of two-handed device to walk alone on a level surface and/or requires human assistance to negotiate stairs.</p> <p>3: Able to walk only with the supervision of another person at all times.</p> <p>4: Chairfast, unable to ambulate but is able to wheel self independently.</p> <p>5: Chairfast, unable to ambulate and unable to wheel self.</p> <p>6: Bedfast, unable to ambulate or be up in a chair.</p> <p>Qualifying Score: M1230 &gt; 0 <u>OR</u> M1860</p> | 7                 |
